# Supplementary material for: Cell-permeable Carboxyl-terminal p27Kip1 Peptide Exhibits Anti-tumor Activity by Inhibiting Pim-1 Kinase
Source: PubMed Central journal article supplement — J Biol Chem. 2010 Nov 9;286(4):2681–8. doi: 10.1074/jbc.M109.092452 (PMC3024764; doi:10.1074/jbc.m109.092452), 2010-11-09
Supplement: supp_M109.092452_jbc.M109.092452-2.pdf [file supp_M109.092452_jbc.M109.092452-2.pdf]

## Supplementary Table S1

### Crystallographic statistics

---

| Data collection                   |                                            |
|-----------------------------------|--------------------------------------------|
| Space group                       | $P6_5$                                     |
| Unit cell parameters              | $a=b=98.2 \text{ \AA}, c=80.3 \text{ \AA}$ |
| Wavelength ( $\text{\AA}$ )       | 0.9700                                     |
| Resolution range ( $\text{\AA}$ ) | 50 – 1.6                                   |
| Redundancy                        | 6.7                                        |
| Unique reflections                | 386876                                     |
| Completeness (%)                  | 99.3 (97.6)                                |
| $I/\sigma(I)$                     | 32.3 (2.8)                                 |
| $R_{\text{sym}}^1$                | 0.054 (0.424)                              |

---

| Refinement                                |                         |
|-------------------------------------------|-------------------------|
| Resolution range ( $\text{\AA}$ )         | 32.1 – 1.60 (1.70-1.60) |
| No. of reflections                        | 57522                   |
| $R$ -factor/Free $R$ -factor <sup>2</sup> | 0.187 / 0.206           |
| RMS deviations                            |                         |
| Bond lengths ( $\text{\AA}$ )             | 0.005                   |
| Bond angles (deg.)                        | 1.2                     |
| Average B-value ( $\text{\AA}^2$ )        | 25.6                    |

---

All numbers in parentheses refer to the highest resolution shell statistics.

<sup>1</sup> $R_{\text{sym}} = \sum |I_{\text{avg}} - I_i| / \sum I_i$ , where  $I_i$  is the observed intensity and  $I_{\text{avg}}$  is the average intensity.

<sup>2</sup>Free  $R$ -factor is calculated for 10 % of randomly selected reflections excluded from refinement.
