# Supplementary material for: Cell-permeable Carboxyl-terminal p27Kip1 Peptide Exhibits Anti-tumor Activity by Inhibiting Pim-1 Kinase
Source: PubMed Central journal article supplement — J Biol Chem. 2010 Nov 9;286(4):2681–8. doi: 10.1074/jbc.M109.092452 (PMC3024764; doi:10.1074/jbc.m109.092452), 2010-11-09
Supplement: supp_M109.092452_jbc.M109.092452-3.pdf [file supp_M109.092452_jbc.M109.092452-3.pdf]

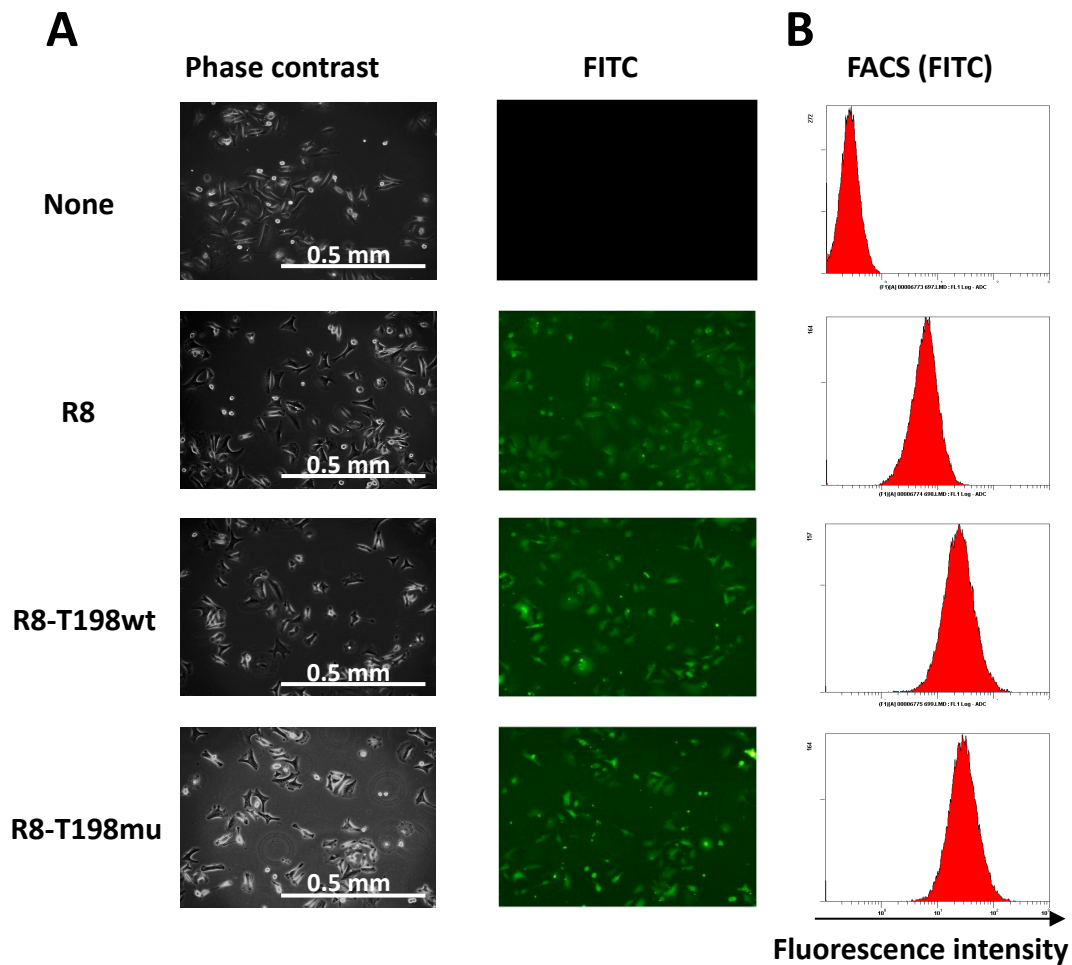

### Supplementary Figure S1.

A. Du145 cells were incubated with 20  $\mu$ M FITC-labeled cell-permeable R8, R8-T198wt or R8-T198mu peptide or without any peptide (None) for 4 h. After washing, specimens were viewed with both phase contrast and fluorescence (FITC) images.

B. Internalization of FITC-labeled R8, R8-T198wt or R8-T198mu peptide was confirmed by performing flow cytometric analysis.

## Supplementary Figure S1

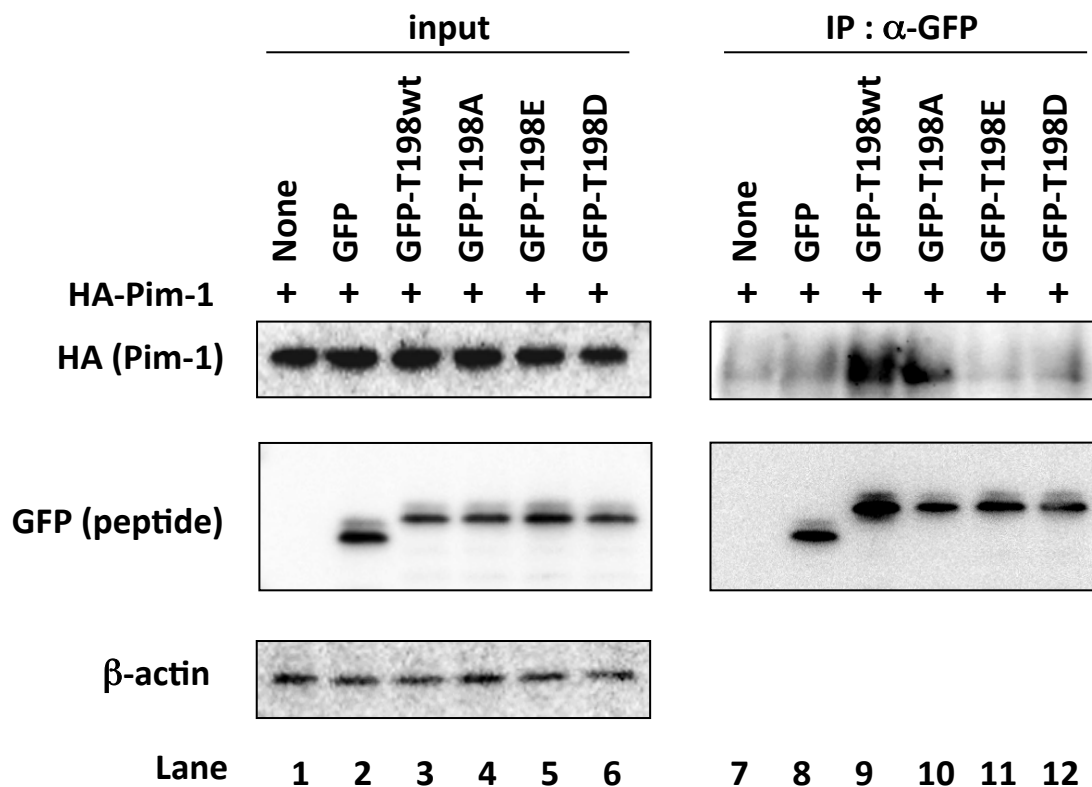

### Supplementary Figure S2.

HEK293T cells were not transfected (None) or were transfected with empty pEGFP-C2 vector (GFP), pEGFP-C2-T198wt (GFP-T198wt), pEGFP-C2-T198A (GFP-T198A), pEGFP-C2-T198E (GFP-T198E) or pEGFP-C2-T198D (GFP-T198D) together with the pHM6-Pim-1 plasmid (+). After transfection for 24 h, cells were lysed, and the GFP-tagged peptides were immunoprecipitated from the cell lysates with protein A-agarose-conjugated anti-GFP antibody. The immunoprecipitated proteins (IP) and cell lysates (input) were subjected to immunoblot analysis with the indicated antibodies.

### Supplementary Figure S2

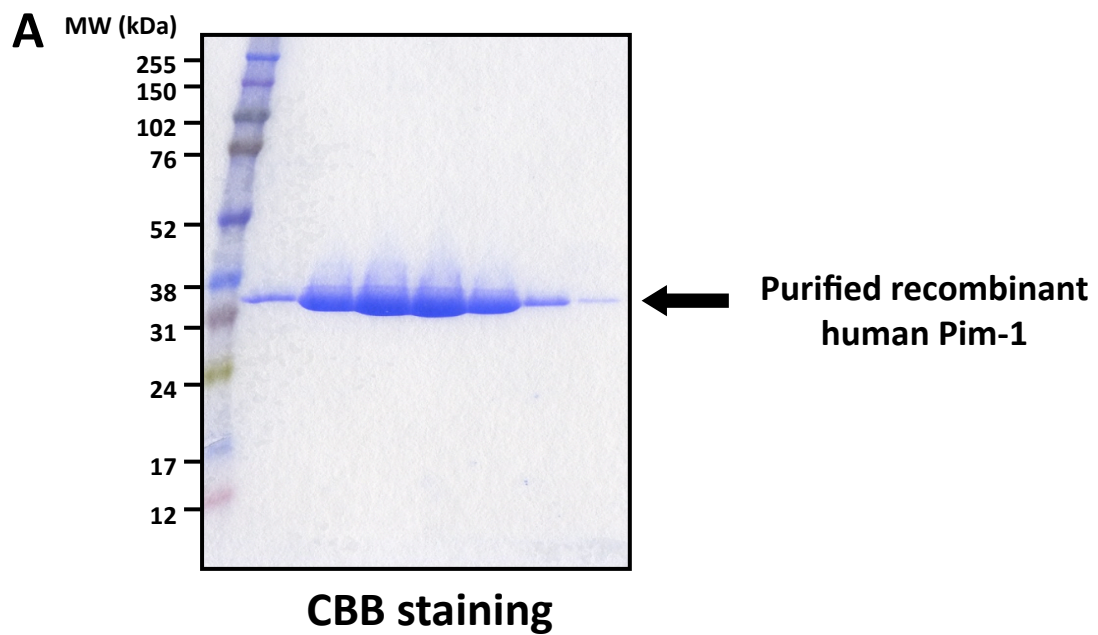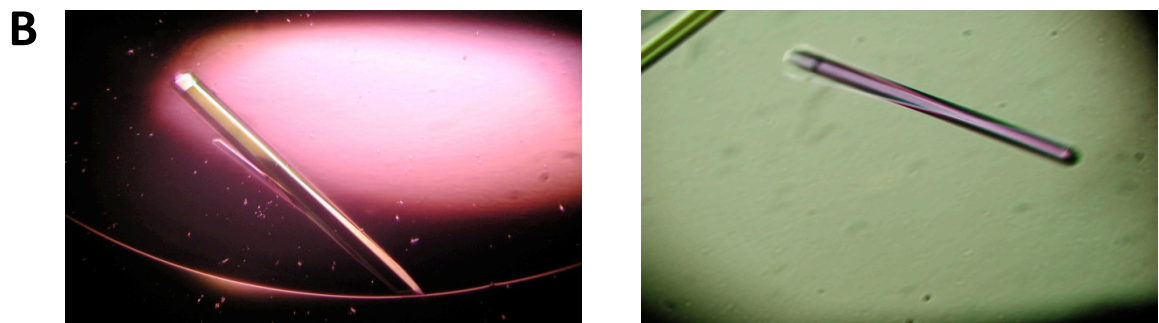

**Supplementary Figure S3.**

A. Purified recombinant human Pim-1 (residues 14-313) was electrophoresed and stained with CBB.

B. Photomicrograph of crystals of Pim-1 in complex with carboxy-terminal p27<sup>Kip1</sup> peptide (T198wt peptide). Large needle-like crystals were appeared.

**Supplementary Figure S3**

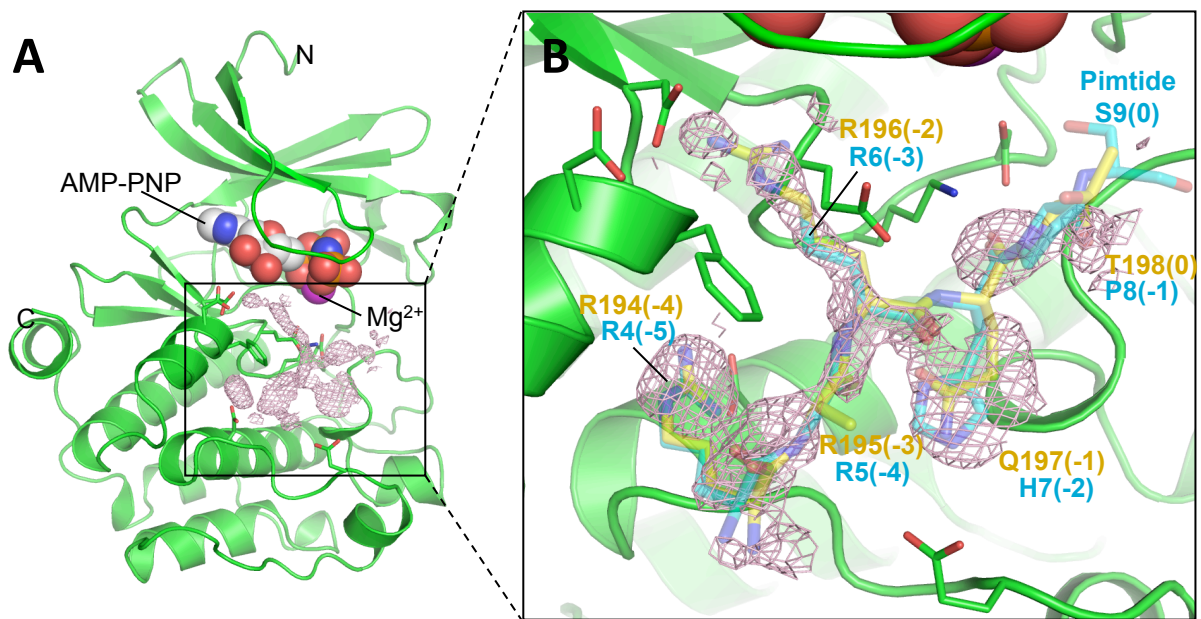

**Supplementary Figure S4.**

- A. Structural overview of Pim-1 co-crystallized with the carboxy-terminal human p27<sup>Kip1</sup> (T198wt) peptide. Bound AMP-PNP and magnesium ion are shown in *sphere representation*. The *2Fo-Fc* electron density map for the substrate-binding site is contoured at  $0.8 \sigma$ .
- B. Enlarged view of substrate-binding site with superimposition of pimtide bound to Pim-1 (cyan, PDB ID: 2BZK) and a hypothetical model of the T198wt peptide (yellow). Substrate-binding residues of Pim-1 are represented by green stick models.

**Supplementary Figure S4**

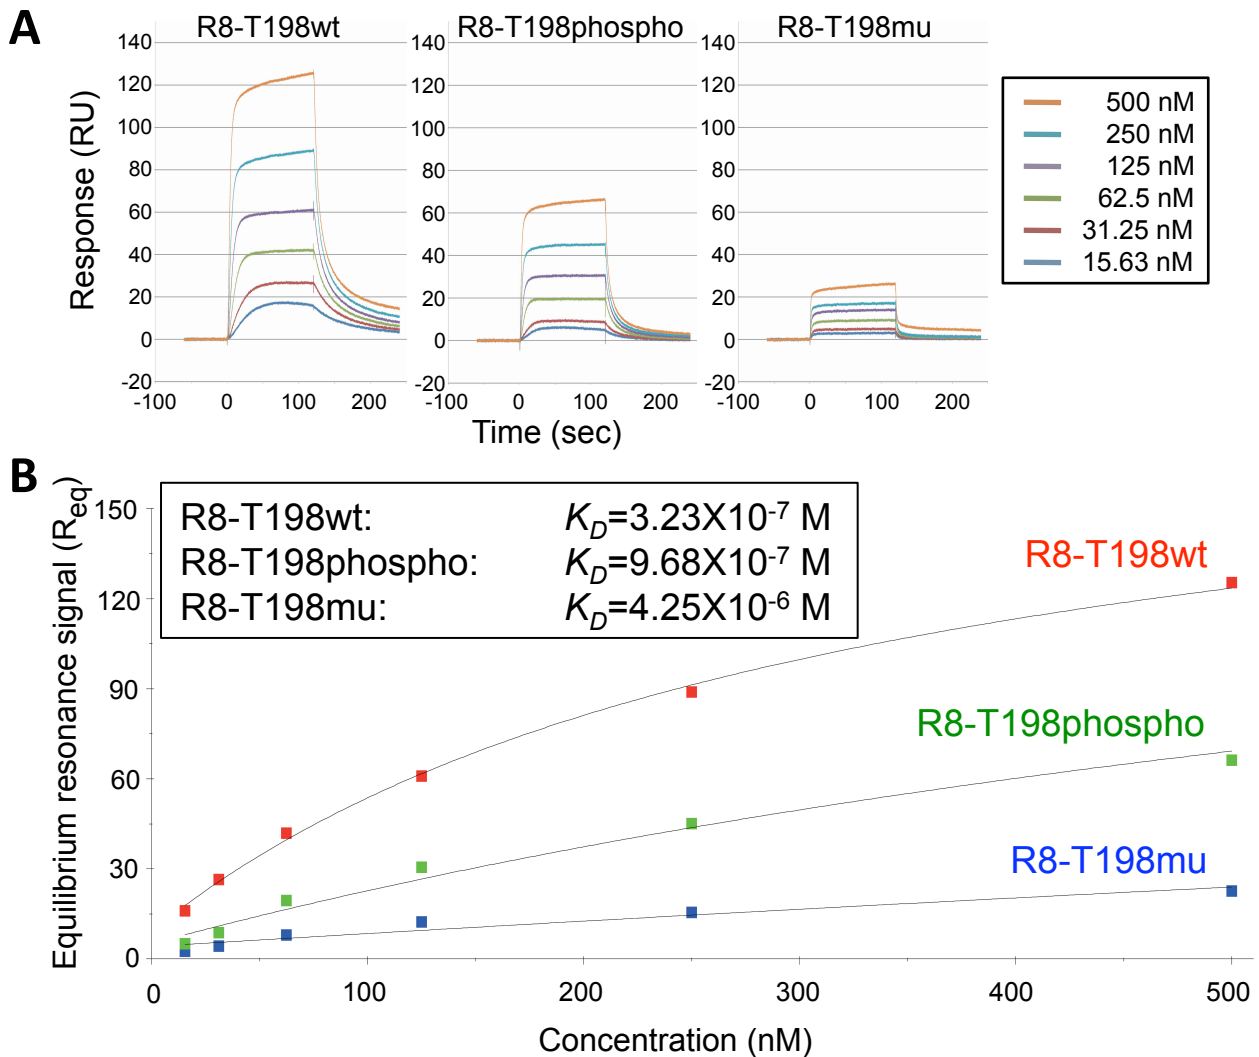

**Supplementary Figure S5.**

- A. Interaction between analyte (FITC-labeled R8-T198wt, R8-T198phospho, and R8-T198mu peptides) and recombinant Pim-1 monitored in real time by Biacore T100. Increasing concentrations of analyte (15.63-500 nM) were passed over a sensor chip with immobilized Pim-1 for 120 s (association phase) before the flow was switched to buffer alone for another 120 s (dissociation phase).
- B. Equilibrium response signal ( $R_{eq}$ ) were plotted against peptide concentration. Using global fitting, equilibrium dissociation constant ( $K_D$ ) was determined from the steady-state affinity model. Repeated experiments gave similar  $K_D$  value.

**Supplementary Figure S5**

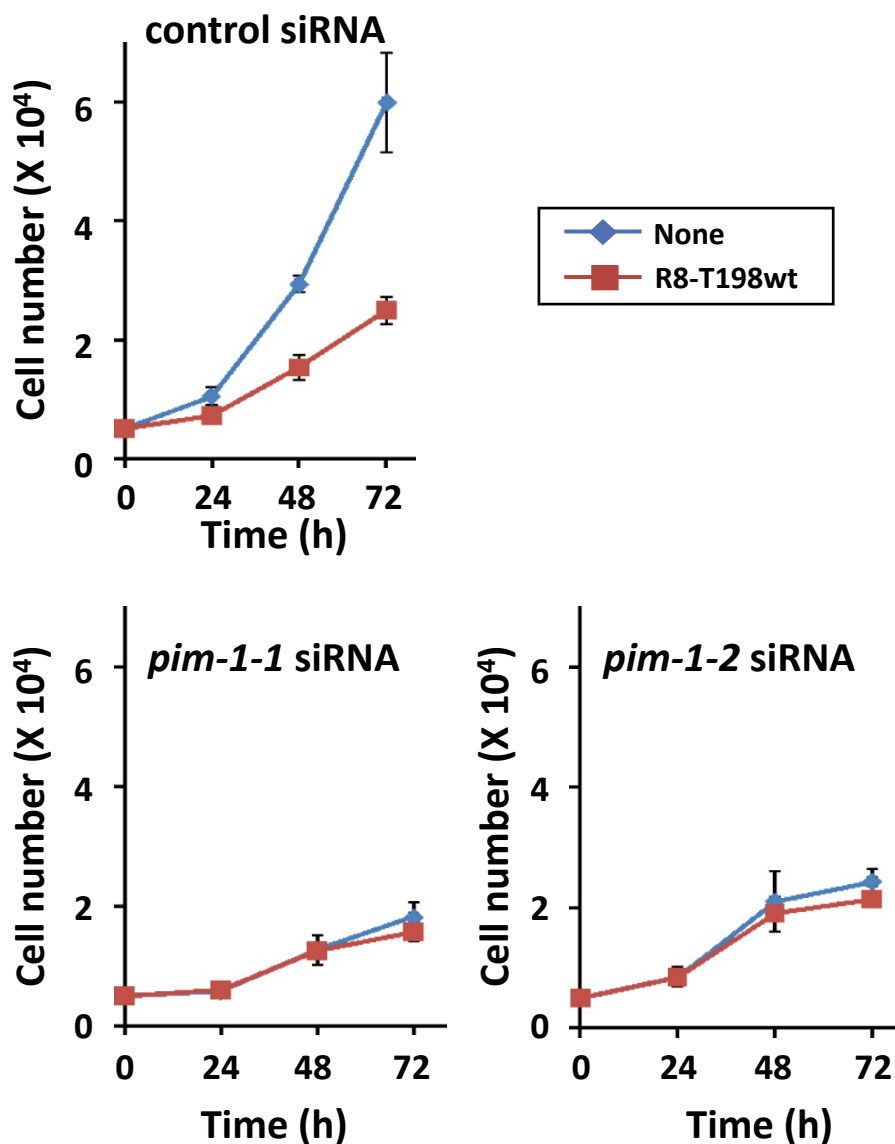

**Supplementary Figure S6.**

Du145 cells were transfected with control, *pim-1-1* or *pim-1-2* siRNA using the LipofectAMINE RNAi MAX. After transfection for 24 h, cells were incubated with vehicle (None) or 10  $\mu$ M FITC-labeled R8-T198wt peptide. At the indicated time points, viable cell number was counted by trypan blue dye exclusion method.

**Supplementary Figure S6**
